# Supplementary material for: Semen proteomics reveals alterations in fertility-related proteins post-recovery from COVID-19
Source: Front Physiol. 2023 Nov 9;14:1212959. doi: 10.3389/fphys.2023.1212959 (PMC10665489; doi:10.3389/fphys.2023.1212959)
Supplement: Supplementary file 1 [file Table2.XLSX]

## Sheet: anova_posthoc
Uniprot ID	Protein name	Gene name	f.value	p.value	-LOG10(p)	FDR	Tukey's HSD
P62258	14-3-3 protein epsilon (14-3-3E)	1433E	6.2209	0.0043702	2.3595	0.032345	2nd wave-1st wave
P31947	14-3-3 protein sigma (Epithelial cell marker protein 1) (Stratifin)	1433S	7.0868	0.0022728	2.6434	0.020618	Control-1st wave; Control-2nd wave
P63104	14-3-3 protein zeta/delta (Protein kinase C inhibitor protein 1) (KCIP-1)	1433Z	7.1411	0.0021831	2.6609	0.020287	Control-1st wave; Control-2nd wave
P12821	Angiotensin-converting enzyme (ACE) (EC 3.4.15.1) (Dipeptidyl carboxypeptidase I) (Kininase II) (CD antigen CD143) [Cleaved into: Angiotensin-converting enzyme, soluble form]	ACE	6.6915	0.0030553	2.5149	0.025306	2nd wave-1st wave; Control-2nd wave
O43707	Alpha-actinin-4 (Non-muscle alpha-actinin 4)	ACTN4	5.8347	0.00589	2.2299	0.038689	Control-1st wave
O00468	Agrin [Cleaved into: Agrin N-terminal 110 kDa subunit; Agrin C-terminal 110 kDa subunit; Agrin C-terminal 90 kDa fragment (C90); Agrin C-terminal 22 kDa fragment (C22)]	AGRIN	5.7401	0.006341	2.1978	0.040036	2nd wave-1st wave
O75969	A-kinase anchor protein 3 (AKAP-3) (A-kinase anchor protein 110 kDa) (AKAP 110) (Cancer/testis antigen 82) (CT82) (Fibrous sheath protein of 95 kDa) (FSP95) (Fibrousheathin I) (Fibrousheathin-1) (Protein kinase A-anchoring protein 3) (PRKA3) (Sperm oocyte-binding protein)	AKAP3	9.9887	0.00029248	3.5339	0.0054736	2nd wave-1st wave; Control-2nd wave
P54802	Alpha-N-acetylglucosaminidase (EC 3.2.1.50) (N-acetyl-alpha-glucosaminidase) (NAG) [Cleaved into: Alpha-N-acetylglucosaminidase 82 kDa form; Alpha-N-acetylglucosaminidase 77 kDa form]	ANAG	7.1686	0.002139	2.6698	0.020287	2nd wave-1st wave; Control-2nd wave
P61204	ADP-ribosylation factor 3	ARF3	6.1829	0.0044995	2.3468	0.032345	Control-2nd wave
Q92484	Acid sphingomyelinase-like phosphodiesterase 3a (ASM-like phosphodiesterase 3a) (EC 3.1.4.-)	ASM3A	5.4582	0.0079126	2.1017	0.044995	Control-2nd wave
P12830	Cadherin-1 (CAM 120/80) (Epithelial cadherin) (E-cadherin) (Uvomorulin) (CD antigen CD324) [Cleaved into: E-Cad/CTF1; E-Cad/CTF2; E-Cad/CTF3]	CADH1	5.5271	0.0074944	2.1253	0.044357	2nd wave-1st wave; Control-2nd wave
P22748	Carbonic anhydrase 4 (EC 4.2.1.1) (Carbonate dehydratase IV) (Carbonic anhydrase IV) (CA-IV)	CAH4	9.8353	0.00032436	3.489	0.0056173	2nd wave-1st wave; Control-2nd wave
P0DP25	Calmodulin-3	CALM3	11.465	0.00011097	3.9548	0.0026424	2nd wave-1st wave; Control-2nd wave
P49913	Cathelicidin antimicrobial peptide (18 kDa cationic antimicrobial protein) (CAP-18) (hCAP-18) [Cleaved into: Antibacterial peptide FALL-39 (FALL-39 peptide antibiotic); Antibacterial peptide LL-37]	CAMP	17.068	4.0477e-06	5.3928	0.00038554	2nd wave-1st wave; Control-2nd wave
Q01518	Adenylyl cyclase-associated protein 1 (CAP 1)	CAP1	7.3248	0.0019058	2.7199	0.019374	2nd wave-1st wave
Q9UBX1	Cathepsin F (CATSF) (EC 3.4.22.41)	CATF	5.3886	0.0083603	2.0778	0.046842	Control-1st wave
P13987	CD59 glycoprotein (1F5 antigen) (20 kDa homologous restriction factor) (HRF-20) (HRF20) (MAC-inhibitory protein) (MAC-IP) (MEM43 antigen) (Membrane attack complex inhibition factor) (MACIF) (Membrane inhibitor of reactive lysis) (MIRL) (Protectin) (CD antigen CD59)	CD59	6.5488	0.0034036	2.4681	0.027016	2nd wave-1st wave; Control-1st wave
P60033	CD81 antigen (26 kDa cell surface protein TAPA-1) (Target of the antiproliferative antibody 1) (Tetraspanin-28) (Tspan-28) (CD antigen CD81)	CD81	5.8128	0.0059913	2.2225	0.038689	Control-2nd wave
Q8TCG1	Protein CIP2A (Cancerous inhibitor of PP2A) (p90 autoantigen)	CIP2A	38.712	3.6023e-10	9.4434	1.3725e-07	2nd wave-1st wave; Control-2nd wave
O60888	Protein CutA (Acetylcholinesterase-associated protein) (Brain acetylcholinesterase putative membrane anchor)	CUTA	14.248	2.0037e-05	4.6982	0.00076342	2nd wave-1st wave
P01034	Cystatin-C (Cystatin-3) (Gamma-trace) (Neuroendocrine basic polypeptide) (Post-gamma-globulin)	CYTC	14.337	1.9011e-05	4.721	0.00076342	2nd wave-1st wave; Control-2nd wave
Q14118	Dystroglycan 1 (Dystroglycan) (Dystrophin-associated glycoprotein 1) [Cleaved into: Alpha-dystroglycan (Alpha-DG); Beta-dystroglycan (Beta-DG)]	DAG1	15.429	1.0103e-05	4.9955	0.00052476	Control-1st wave; Control-2nd wave
Q9BVM2	Protein DPCD	DPCD	7.5468	0.0016194	2.7906	0.019281	2nd wave-1st wave
P27487	Dipeptidyl peptidase 4 (EC 3.4.14.5) (ADABP) (Adenosine deaminase complexing protein 2) (ADCP-2) (Dipeptidyl peptidase IV) (DPP IV) (T-cell activation antigen CD26) (TP103) (CD antigen CD26) [Cleaved into: Dipeptidyl peptidase 4 membrane form (Dipeptidyl peptidase IV membrane form); Dipeptidyl peptidase 4 soluble form (Dipeptidyl peptidase IV soluble form)]	DPP4	7.3469	0.0018752	2.727	0.019374	2nd wave-1st wave
P68104	Elongation factor 1-alpha 1 (EF-1-alpha-1) (Elongation factor Tu) (EF-Tu) (Eukaryotic elongation factor 1 A-1) (eEF1A-1) (Leukocyte receptor cluster member 7)	EF1A1	12.067	7.5692e-05	4.1209	0.0022184	2nd wave-1st wave; Control-2nd wave
P20827	Ephrin-A1 (EPH-related receptor tyrosine kinase ligand 1) (LERK-1) (Immediate early response protein B61) (Tumor necrosis factor alpha-induced protein 4) (TNF alpha-induced protein 4) [Cleaved into: Ephrin-A1, secreted form]	EFNA1	11.219	0.00012998	3.8861	0.0028468	2nd wave-1st wave; Control-2nd wave
P04066	Tissue alpha-L-fucosidase (EC 3.2.1.51) (Alpha-L-fucosidase I) (Alpha-L-fucoside fucohydrolase 1) (Alpha-L-fucosidase 1)	FUCO	11.56	0.00010438	3.9814	0.0026424	2nd wave-1st wave; Control-2nd wave
Q9BTY2	Plasma alpha-L-fucosidase (EC 3.2.1.51) (Alpha-L-fucoside fucohydrolase 2) (Alpha-L-fucosidase 2)	FUCO2	5.8557	0.0057944	2.237	0.038689	2nd wave-1st wave; Control-2nd wave
Q14697	Neutral alpha-glucosidase AB (EC 3.2.1.207) (Alpha-glucosidase 2) (Glucosidase II subunit alpha)	GANAB	8.224	0.00099294	3.0031	0.013511	Control-1st wave; Control-2nd wave
Q99988	Growth/differentiation factor 15 (GDF-15) (Macrophage inhibitory cytokine 1) (MIC-1) (NSAID-activated gene 1 protein) (NAG-1) (NSAID-regulated gene 1 protein) (NRG-1) (Placental TGF-beta) (Placental bone morphogenetic protein) (Prostate differentiation factor)	GDF15	5.516	0.00756	2.1215	0.044357	2nd wave-1st wave; Control-2nd wave
P28799	Progranulin (PGRN) (Acrogranin) (Epithelin precursor) (Glycoprotein of 88 Kda) (GP88) (Glycoprotein 88) (Granulin precursor) (PC cell-derived growth factor) (PCDGF) (Proepithelin) (PEPI) [Cleaved into: Paragranulin; Granulin-1 (Granulin G); Granulin-2 (Granulin F); Granulin-3 (Epithelin-2) (Granulin B); Granulin-4 (Epithelin-1) (Granulin A); Granulin-5 (Granulin C); Granulin-6 (Granulin D); Granu…	GRN	15.854	7.9348e-06	5.1005	0.00050386	2nd wave-1st wave; Control-2nd wave
P00390	Glutathione reductase, mitochondrial (GR) (GRase) (EC 1.8.1.7)	GSHR	7.8126	0.0013346	2.8746	0.01695	Control-2nd wave
P84243	Histone H3.3	H33	6.2879	0.0041515	2.3818	0.03228	2nd wave-1st wave
P62805	Histone H4	H4	5.3013	0.0089596	2.0477	0.049473	2nd wave-1st wave
P49773	Adenosine 5'-monophosphoramidase HINT1 (EC 3.9.1.-) (Desumoylating isopeptidase HINT1) (EC 3.4.22.-) (Histidine triad nucleotide-binding protein 1) (Protein kinase C inhibitor 1) (Protein kinase C-interacting protein 1) (PKCI-1)	HINT1	14.022	2.2904e-05	4.6401	0.00079331	2nd wave-1st wave; Control-2nd wave
P35527	Keratin, type I cytoskeletal 9 (Cytokeratin-9) (CK-9) (Keratin-9) (K9)	K1C9	7.3697	0.001844	2.7342	0.019374	Control-2nd wave
O15230	Laminin subunit alpha-5 (Laminin-10 subunit alpha) (Laminin-11 subunit alpha) (Laminin-15 subunit alpha)	LAMA5	25.416	6.6179e-08	7.1793	8.4047e-06	2nd wave-1st wave; Control-2nd wave
P11047	Laminin subunit gamma-1 (Laminin B2 chain) (Laminin-1 subunit gamma) (Laminin-10 subunit gamma) (Laminin-11 subunit gamma) (Laminin-2 subunit gamma) (Laminin-3 subunit gamma) (Laminin-4 subunit gamma) (Laminin-6 subunit gamma) (Laminin-7 subunit gamma) (Laminin-8 subunit gamma) (Laminin-9 subunit gamma) (S-laminin subunit gamma) (S-LAM gamma)	LAMC1	10.635	0.0001903	3.7206	0.0038161	2nd wave-1st wave; Control-2nd wave
P17931	Galectin-3 (Gal-3) (35 kDa lectin) (Carbohydrate-binding protein 35) (CBP 35) (Galactose-specific lectin 3) (Galactoside-binding protein) (GALBP) (IgE-binding protein) (L-31) (Laminin-binding protein) (Lectin L-29) (Mac-2 antigen)	LEG3	12.358	6.3069e-05	4.2002	0.0020024	2nd wave-1st wave; Control-2nd wave
O00339	Matrilin-2	MATN2	6.205	0.0044238	2.3542	0.032345	Control-2nd wave
P60660	Myosin light polypeptide 6 (17 kDa myosin light chain) (LC17) (Myosin light chain 3) (MLC-3) (Myosin light chain alkali 3) (Myosin light chain A3) (Smooth muscle and nonmuscle myosin light chain alkali 6)	MYL6	7.3627	0.0018535	2.732	0.019374	2nd wave-1st wave; Control-2nd wave
P22392	Nucleoside diphosphate kinase B (NDK B) (NDP kinase B) (EC 2.7.4.6) (C-myc purine-binding transcription factor PUF) (Histidine protein kinase NDKB) (EC 2.7.13.3) (nm23-H2)	NDKB	5.4645	0.0078737	2.1038	0.044995	Control-2nd wave
Q9BZQ8	Protein Niban 1 (Cell growth-inhibiting gene 39 protein) (Protein FAM129A)	NIBA1	7.2931	0.001951	2.7097	0.019374	2nd wave-1st wave; Control-2nd wave
P61916	NPC intracellular cholesterol transporter 2 (Epididymal secretory protein E1) (Human epididymis-specific protein 1) (He1) (Niemann-Pick disease type C2 protein)	NPC2	5.5147	0.0075675	2.121	0.044357	2nd wave-1st wave
Q8WXA2	Prostate and testis expressed protein 1	PATE1	7.4733	0.0017089	2.7673	0.019374	2nd wave-1st wave
O76074	cGMP-specific 3',5'-cyclic phosphodiesterase (EC 3.1.4.35) (cGMP-binding cGMP-specific phosphodiesterase) (CGB-PDE)	PDE5A	9.2998	0.00046728	3.3304	0.0077406	2nd wave-1st wave; Control-2nd wave
P20142	Gastricsin (EC 3.4.23.3) (Pepsinogen C)	PEPC	5.6838	0.0066263	2.1787	0.04072	2nd wave-1st wave
P00558	Phosphoglycerate kinase 1 (EC 2.7.2.3) (Cell migration-inducing gene 10 protein) (Primer recognition protein 2) (PRP 2)	PGK1	7.6144	0.0015414	2.8121	0.018945	2nd wave-1st wave
Q15435	Protein phosphatase 1 regulatory subunit 7 (Protein phosphatase 1 regulatory subunit 22)	PP1R7	6.0933	0.0048207	2.3169	0.034013	2nd wave-1st wave; Control-2nd wave
P62937	Peptidyl-prolyl cis-trans isomerase A (PPIase A) (EC 5.2.1.8) (Cyclophilin A) (Cyclosporin A-binding protein) (Rotamase A) [Cleaved into: Peptidyl-prolyl cis-trans isomerase A, N-terminally processed]	PPIA	5.9345	0.0054508	2.2635	0.037085	Control-2nd wave
Q06830	Peroxiredoxin-1 (EC 1.11.1.24) (Natural killer cell-enhancing factor A) (NKEF-A) (Proliferation-associated gene protein) (PAG) (Thioredoxin peroxidase 2) (Thioredoxin-dependent peroxide reductase 2) (Thioredoxin-dependent peroxiredoxin 1)	PRDX1	5.9402	0.0054268	2.2655	0.037085	Control-1st wave; Control-2nd wave
Q9NRW1	Ras-related protein Rab-6B (EC 3.6.5.2)	RAB6B	8.9133	0.00061065	3.2142	0.0089484	Control-1st wave; Control-2nd wave
P61224	Ras-related protein Rap-1b (EC 3.6.5.2) (GTP-binding protein smg p21B)	RAP1B	8.1388	0.0010553	2.9766	0.013865	2nd wave-1st wave; Control-2nd wave
P34096	Ribonuclease 4 (RNase 4) (EC 3.1.27.-)	RNAS4	6.2317	0.0043342	2.3631	0.032345	2nd wave-1st wave; Control-2nd wave
O00584	Ribonuclease T2 (EC 4.6.1.19) (Ribonuclease 6)	RNT2	15.277	1.1019e-05	4.9579	0.00052476	2nd wave-1st wave; Control-1st wave
P31949	Protein S100-A11 (Calgizzarin) (Metastatic lymph node gene 70 protein) (MLN 70) (Protein S100-C) (S100 calcium-binding protein A11) [Cleaved into: Protein S100-A11, N-terminally processed]	S10AB	7.2709	0.0019832	2.7026	0.019374	Control-2nd wave
P02743	Serum amyloid P-component (SAP) (9.5S alpha-1-glycoprotein) [Cleaved into: Serum amyloid P-component(1-203)]	SAMP	6.963	0.0024924	2.6034	0.022084	Control-1st wave
P04279	Semenogelin-1 (Cancer/testis antigen 103) (Semenogelin I) (SGI) [Cleaved into: Alpha-inhibin-92; Alpha-inhibin-31; Seminal basic protein]	SEMG1	11.922	8.2951e-05	4.0812	0.0022575	2nd wave-1st wave
Q02383	Semenogelin-2 (Semenogelin II) (SGII)	SEMG2	6.8986	0.0026153	2.5825	0.022646	2nd wave-1st wave
Q9HAT2	Sialate O-acetylesterase (EC 3.1.1.53) (H-Lse) (Sialic acid-specific 9-O-acetylesterase)	SIAE	15.934	7.5887e-06	5.1198	0.00050386	2nd wave-1st wave; Control-2nd wave
Q9H173	Nucleotide exchange factor SIL1 (BiP-associated protein) (BAP)	SIL1	9.9426	0.0003017	3.5204	0.0054736	2nd wave-1st wave; Control-2nd wave
P03973	Antileukoproteinase (ALP) (BLPI) (HUSI-1) (Mucus proteinase inhibitor) (MPI) (Protease inhibitor WAP4) (Secretory leukocyte protease inhibitor) (Seminal proteinase inhibitor) (WAP four-disulfide core domain protein 4)	SLPI	6.6214	0.0032215	2.4919	0.026115	2nd wave-1st wave
P00441	Superoxide dismutase [Cu-Zn] (EC 1.15.1.1) (Superoxide dismutase 1) (hSod1)	SODC	6.7361	0.0029545	2.5295	0.025014	2nd wave-1st wave; Control-2nd wave
O43278	Kunitz-type protease inhibitor 1 (Hepatocyte growth factor activator inhibitor type 1) (HAI-1)	SPIT1	5.7263	0.00641	2.1931	0.040036	2nd wave-1st wave
P17987	T-complex protein 1 subunit alpha (TCP-1-alpha) (CCT-alpha)	TCPA	9.0794	0.0005441	3.2643	0.0082921	2nd wave-1st wave; Control-2nd wave
P07477	Serine protease 1 (EC 3.4.21.4) (Anionic trypsin I) (Anionic trypsin-I) (Beta-trypsin) (Cationic trypsinogen) (Pretrypsinogen I) (Trypsin I) (Trypsin-1) [Cleaved into: Alpha-trypsin chain 1; Alpha-trypsin chain 2]	TRY1	9.1367	0.00052294	3.2815	0.0082921	2nd wave-1st wave; Control-2nd wave
Q96JG6	Syndetin (Coiled-coil domain-containing protein 132) (EARP/GARPII complex subunit VPS50)	VPS50	11.166	0.00013449	3.8713	0.0028468	2nd wave-1st wave; Control-2nd wave
Q14508	WAP four-disulfide core domain protein 2 (Epididymal secretory protein E4) (Major epididymis-specific protein E4) (Putative protease inhibitor WAP5)	WFDC2	8.2764	0.00095658	3.0193	0.013498	2nd wave-1st wave
P25311	Zinc-alpha-2-glycoprotein (Zn-alpha-2-GP) (Zn-alpha-2-glycoprotein)	ZA2G	26.364	4.3519e-08	7.3613	8.2904e-06	2nd wave-1st wave; Control-2nd wave
